# Supplementary material
Source: publisher figshare collection journal article supplement (https://springernature.figshare.com/ndownloader/files/21101808)
Supplement: Supplementary file [file 21101808]

**53- weeks-before \_52-first-order-difference feature space. In all, we have 105 predictors.**

| Feature space |           |                                              |                              |                |     |                 |                        |     |                   |
|---------------|-----------|----------------------------------------------|------------------------------|----------------|-----|-----------------|------------------------|-----|-------------------|
| Time series   |           | 53- weeks-before _52-first-order-differences |                              |                |     |                 |                        |     |                   |
|               |           | Response                                     | Current data & historic data |                |     |                 | First-order difference |     |                   |
| Year          | Weeks (W) | ILI rates "y"                                | ILI rates "x1"               | ILI rates "x2" | ... | ILI rates "x53" | (1 W ago) " x54"       | ... | (1 W ago) " x105" |
|               |           |                                              | (1 W ago)                    | (2 W ago)      | ... | (53 W ago)      | (2 W ago)              | ... | (53 W ago)        |
| 2014          | 1         | 0.47833                                      | N/A                          | N/A            | ... | N/A             | N/A                    | ... | N/A               |
| ...           | ...       | ...                                          | ...                          | ...            | ... | ...             | ...                    | ... | ...               |
| 2015          | 2         | 0.5028                                       | 0.54994                      | 0.52333        | ... | 0.47833         | 0.02661                | ... | 0.07161           |
| ...           | ...       | ...                                          | ...                          | ...            | ... | ...             | ...                    | ... | ...               |
| 2018          | 41        | 0.58767                                      | 0.54521                      | 0.53932        | ... | 0.59863         | 0.00589                | ... | -0.05342          |
| 2018          | 42        | 0.59545                                      | 0.58767                      | 0.54521        | ... | 0.61305         | 0.04246                | ... | -0.02538          |

**N-years-before\_m-weeks-around feature space. In case of n=1 and m=5, we have 38 predictors for use as feature spaces.**

| Feature space |           |                               |                              |     |                |                  |     |                 |     |                 |
|---------------|-----------|-------------------------------|------------------------------|-----|----------------|------------------|-----|-----------------|-----|-----------------|
| Time series   |           | n-years-before_m-weeks-around |                              |     |                |                  |     |                 |     |                 |
|               |           | Response                      | Current data & historic data |     |                |                  |     |                 |     |                 |
| Year          | Weeks (W) | ILI rates "y"                 | ILI rates                    |     |                |                  |     |                 |     |                 |
|               |           |                               | "x1"                         | ... | "x5"           | "x6"             | ... | "x11"           | ... | "x16"           |
|               |           |                               | 1 W Before "y"               | ... | 5 W Before "y" | 5 W before "x11" | ... | 52 W before "y" | ... | 5 W After "x11" |
| 2014          | 1         | 0.47833                       | N/A                          | ... | N/A            | N/A              | ... | N/A             | ... | N/A             |
| ...           | ...       | ...                           | ...                          | ... | ...            | ...              | ... | ...             | ... | ...             |
| 2017          | 6         | 0.61254                       | 0.61788                      | ... | 0.6575         | 0.60343          | ... | 0.65494         | ... | 0.58054         |
| ...           | ...       | ...                           | ...                          | ... | ...            | ...              | ... | ...             | ... | ...             |
| 2018          | 41        | 0.58767                       | 0.54521                      | ... | 0.4658         | 0.44534          | ... | 0.61305         | ... | 0.59173         |
| 2018          | 42        | 0.59545                       | 0.58767                      | ... | 0.5195         | 0.51195          | ... | 0.60443         | ... | 0.57901         |

**The models, programming languages, and libraries, which were used in this study**

| <i>Feature space</i>                                    | <i>models</i>                                          | <i>Programming Libraries</i>                       |
|---------------------------------------------------------|--------------------------------------------------------|----------------------------------------------------|
| Time series                                             | Average, Naïve, Seasonal Naïve, Drift, STL, DHR, TBATS | Forecast (version 8.4)                             |
| 53- weeks-<br>before_52-<br>first-order-<br>differences | GLM, SVR, GB, RF                                       | Caret package (Version 6.0-8)                      |
|                                                         | LSTM                                                   | Keras (Version 2.2.4)<br>Tensorflow (Version 1.10) |
| n-years-<br>before_m-<br>weeks-around                   | GLM, SVR, GB, RF                                       | Caret package (Version 6.0-8)                      |
|                                                         | LSTM                                                   | Keras (Version 2.2.4)<br>Tensorflow (Version 1.10) |
